# Supplementary material
Source: PubMed Central journal article supplement (PMC5105354)
Supplement: Supp_Figure2.pdf [file Supp_Figure2.pdf]

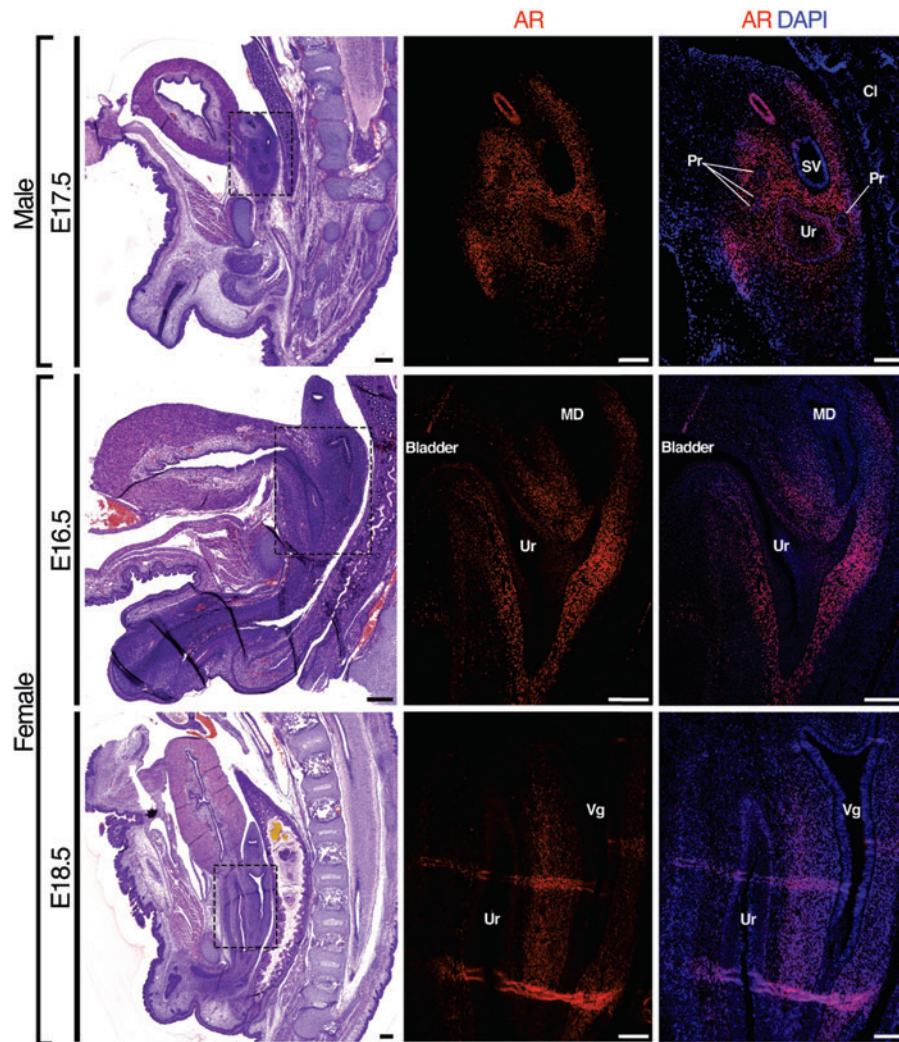

**SUPPLEMENTARY FIG. S2.** AR expression in the mouse CMDM and UGSM. H&E staining and IF staining of AR in sagittal section. E17.5 male embryos, and E16.5, and E18.5 female embryos are represented here. MD, Müllerian duct; Pr, prostate; SV, seminal vesicle; Vg, vagina. Scale bars, 200  $\mu$ m. AR, androgen receptor; CMDM, caudal Müllerian duct mesenchyme; UGSM, urogenital sinus mesenchyme.
