# Supplementary material
Source: PubMed Central journal article supplement (PMC5105354)
Supplement: Supp_Figure3.pdf [file Supp_Figure3.pdf]

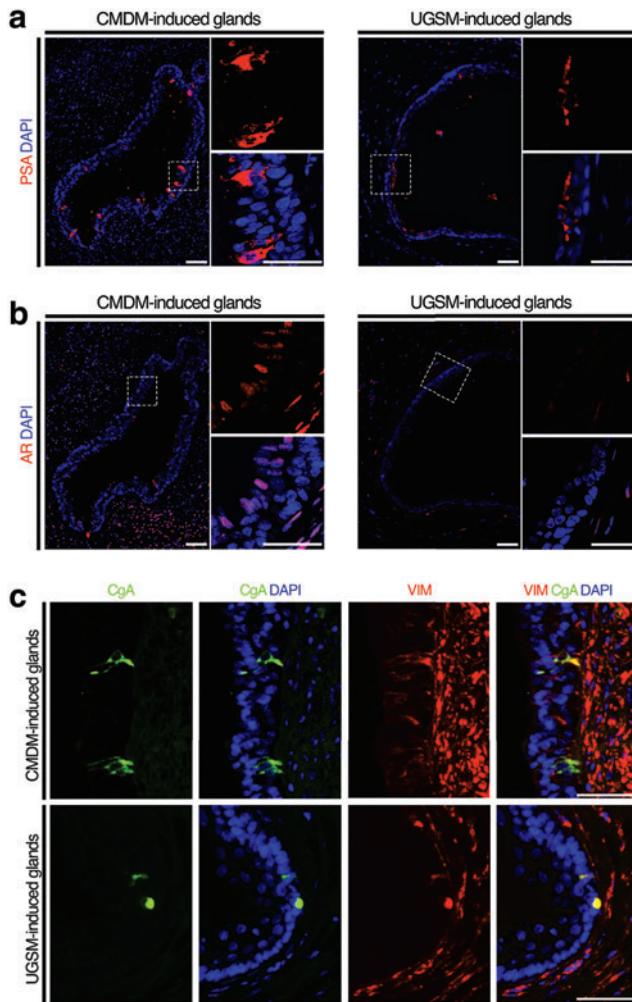

**SUPPLEMENTARY FIG. S3.** Expression of PSA, AR, and chromogranin A in hESC-derived tissue recombinant glands. **(a)** IF staining of PSA in CMDM-induced and UGSM-induced glands. Scale bars, 200 μm, 50 μm (enlarged pictures). **(b)** IF staining of AR in CMDM-induced and UGSM-induced glands. Scale bars, 200 μm, 50 μm (enlarged pictures). **(c)** IF staining of CgA and VIM in CMDM-induced and UGSM-induced glands. Scale bar, 50 μm. CgA, chromogranin A; hESC, human embryonic stem cell; PSA, prostate-specific antigen; VIM, vimentin.
